# Supplementary material
Source: HighWire-hosted journal article supplement (http://www.cmaj.ca/highwire/filestream/58357/field_highwire_adjunct_files/0/21f.pdf)
Supplement: 21f.pdf [file 21f.pdf]

# Le point sur les soins de santé préventifs en l'an 2000 : Dépistage et traitement de l'hyperhomocystéinémie pour la prévention des accidents coronariens

Gillian L. Booth,\* Elaine E.L. Wang,<sup>†</sup> et le Groupe d'étude canadien sur les soins de santé préventifs<sup>‡</sup>

## Résumé

**Objectif :** Formuler des directives pour le dépistage et le traitement de l'hyperhomocystéinémie dans le cadre des mesures diagnostiques et thérapeutiques appliquées à la maladie coronarienne.

**Options :** Dosage des taux plasmatiques d'homocystéine totale (tHcy) à jeun ou 4 à 6 heures après l'administration orale de méthionine; supplément vitaminique d'acide folique et de vitamines B<sub>6</sub> et B<sub>12</sub>; respect de l'apport quotidien recommandé en folates et en vitamines B<sub>6</sub> et B<sub>12</sub> de source alimentaire.

**Résultats :** Cet article passe en revue les preuves mises au jour sur le lien entre les taux plasmatiques de tHcy et la maladie coronarienne et l'effet d'un abaissement des taux de tHcy obtenu par l'administration de suppléments vitaminiques ou par des mesures diététiques.

**Preuves :** On a interrogé le réseau MEDLINE pour relever les articles de langue anglaise pertinents publiés entre janvier 1966 et juin 1999; d'autres articles identifiés à partir des bibliographies ont également été passés en revue.

**Avantages, préjudices et coûts :** La maladie cardiovasculaire vient au premier rang des causes de mortalité au Canada. L'homocystéine, générée par le métabolisme de la méthionine, pourrait exercer un rôle dans le développement de la maladie cardiovasculaire. La prévalence de l'hyperhomocystéinémie dans la population générale serait de 5 à 10 % et elle pourrait atteindre 30 ou 40 % chez les gens âgés. Si l'on se fie aux études menées auprès de la population, on pourrait imputer jusqu'à 10 % des accidents coronariens à la tHcy, qui représente ainsi un important facteur de risque potentiellement modifiable de maladie cardiovasculaire. On limite actuellement le dosage en laboratoire de la tHcy aux centres de recherche et le coût de ces tests varie de 30 à 50 \$ par personne. De nouvelles techniques moins coûteuses ont été mises au point et devraient éventuellement être facilement accessibles.

**Valeurs :** La validité des preuves fournies a été évaluée à l'aide de méthodes élaborées par le Groupe d'étude canadien sur les soins de santé préventifs.

**Recommandations :** Bien que les preuves dont on dispose pour l'instant soient insuffisantes pour que l'on puisse recommander le dépistage ou le traitement de l'hyperhomocystéinémie (recommandations de catégorie C), on préconise le respect de l'apport quotidien recommandé de folates et de vitamines B<sub>12</sub> et B<sub>6</sub> de source alimentaire. Si l'on découvre une élévation des taux de tHcy, il faut d'abord écarter la présence possible d'une carence vitaminique afin de permettre un traitement spécifique et de prévenir les complications, comme les séquelles neurologiques du déficit en vitamine B<sub>12</sub>. Les experts du domaine préconisent le traitement de l'hyperhomocystéinémie chez les patients à haut risque, par exemple ceux qui ont des antécédents personnels ou familiaux d'athérosclérose précoce ou qui sont sujets à l'hyperhomocystéinémie. Une fois que des essais cliniques randomisés auront été complétés et qu'ils auront confirmé l'effet des

## Recherche

## Research

Des départements de \*médecine et de †pédiatrie, Programme de recherche en épidémiologie clinique et soins de santé préventifs de l'Université de Toronto, Toronto (Ont.)

*‡Autrefois, Groupe d'étude canadien sur l'examen médical périodique. La liste des membres du groupe d'étude apparaît à la fin de l'article.*

*Cet article a fait l'objet d'un examen par les pairs.*

Traduction d'un article paru dans le JAMC 2000;163(1):21-9

suppléments vitaminiques sur les accidents coronariens, des directives définitives pour le traitement de l'hyperhomocystéinémie pourront être émises.

**Validation :** Les conclusions de cette analyse ont été passées en revue par les membres du Groupe d'étude canadien sur les soins de santé préventifs par le biais d'un processus itératif.

**Commanditaires :** Le Groupe d'étude canadien sur les soins de santé préventifs est subventionné grâce à un partenariat entre les ministères de la Santé des provinces et des territoires et Santé Canada.

La maladie cardiovasculaire est la principale cause de mortalité au Canada; près de 40 % de tous les décès lui sont imputables.<sup>1</sup> Bien que les taux de mortalité associés à la maladie cardiaque ischémique soient à la baisse,<sup>2</sup> ses coûts pour la société restent élevés. Étant donné qu'un certain nombre de décès d'origine cardiovasculaire peuvent être prévenus, la recherche sur de nouveaux facteurs de risque possibles se poursuit. L'homocystéine est un agent intermédiaire produit par le métabolisme de la méthionine (Figure 1). Selon plusieurs observations intéressantes, l'homocystéine jouerait un rôle dans le développement de la maladie cardiovasculaire. Les personnes qui présentent de l'homocystinurie,<sup>3</sup> une maladie héréditaire transmise selon un mode autosomique récessif, souffrent d'hyperhomocystéinémie grave, d'athérosclérose précoce et de complications thrombo-emboliques.<sup>4</sup> En outre, l'homocystéine pourrait favoriser l'oxydation du cholestérol à lipoprotéines de basse densité, la prolifération des cellules du muscle lisse vasculaire, l'activation des plaquettes et des facteurs de coagulation et la dysfonction en-

dothéliale.<sup>5-7</sup> Par conséquent, les anomalies du métabolisme de l'homocystéine sont désormais au centre d'une attention croissante en raison de leur rôle potentiel dans la pathogenèse de l'athérosclérose et d'autres maladies comme la thrombose veineuse.<sup>8,9</sup>

La prévalence de l'hyperhomocystéinémie dans la population générale serait de 5 à 10 % selon un seuil fixé aux 90<sup>e</sup> ou 95<sup>e</sup> percentiles (environ 15 µmol/L).<sup>7</sup> Par contre, ce taux pourrait s'élever à 30 ou 40 % chez les gens âgés.<sup>10</sup> Si l'on se fie aux résultats d'études menées dans la population, jusqu'à 10 % des accidents coronariens pourraient en fait être attribuables à une augmentation des taux plasmatiques d'homocystéine.<sup>11</sup> Ainsi, l'homocystéine représenterait un important facteur de risque potentiellement modifiable de maladie cardiovasculaire.

Le but de la présente synthèse est d'évaluer la qualité des preuves qui établissent un lien entre l'homocystéine et les accidents coronariens et de formuler des recommandations pour le dépistage et le traitement de l'hyperhomocystéinémie.

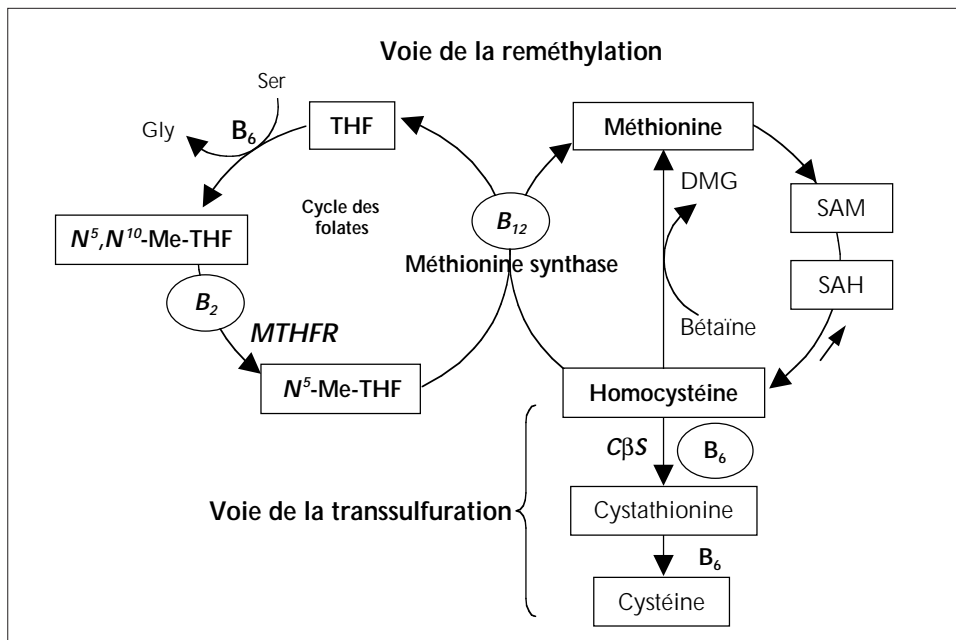

Fig. 1: Voies biochimiques du métabolisme de l'homocystéine. Ser = serine; Gly = glycine; Me-THF = méthyltétrahydrofolate; MTHFR =  $N^5,N^{10}$ -méthyltétrahydrofolate réductase; THF = tétrahydrofolate; SAM = S-adosylméthionine; SAH = S-adosylhomocystéine; DMG = diméthylglycine; CbS = cystathionine- $\beta$ -synthase.

## Méthodes

Une interrogation informatique du réseau MEDLINE a été effectuée à partir des mots clés MeSH (vedettes-matières médicales) «*homocysteine*» (homocystéine), «*hyperhomocysteinemia*» (hyperhomocystéinémie), «*methionine*» (méthionine), «*coronary disease*» (maladie coronarienne), «*arteriosclerosis*» (artériosclérose), «*myocardial ischemia*» (ischémie myocardique), «*folic acid*» (acide folique), «*vitamin B<sub>12</sub>*» (vitamine B<sub>12</sub>), «*vitamin B<sub>6</sub>*» (vitamine B<sub>6</sub>) et «*pyridoxine*» (pyridoxine) en diverses combinaisons pour retracer les articles de langue anglaise publiés sur ces sujets entre janvier 1966 et juin 1999. D'autres articles pertinents ont également été relevés dans les références fournies. Dans la mesure du possible, le niveau de preuve le plus élevé a été recherché. C'est ce qui explique que les résumés, les études transversales et les rapports de cas, de même que les séries d'études de cas ont été exclus. Les études portant sur d'autres types de maladies vasculaires ont également été exclues.

Les preuves ont été systématiquement revues à l'aide de la méthodologie mise au point par le Groupe d'étude canadien sur les soins de santé préventifs. Le groupe d'étude, composé de médecins et de méthodologistes chevronnés appartenant à diverses spécialités médicales, a utilisé une méthode standardisée fondée sur des preuves (Annexe 1) pour évaluer l'efficacité de l'intervention. Les recommandations finales ont fait l'objet d'un consensus unanime entre le comité d'experts et l'auteur principal. Les commentaires de deux experts en matière de contenu ont été incorporés à l'ébauche finale du manuscrit avant sa soumission pour publication. La marche à suivre imposée pour obtenir la documentation pertinente et pour assurer la constance, l'intelligibilité, l'objectivité du rapport et le respect de la méthodologie établie par le groupe d'étude a été respectée à chaque étape de sa préparation et pendant tout le processus de consultation et de rédaction. La méthodologie complète a déjà été décrite.<sup>12</sup>

## Les tests de dépistage de l'hyperhomocystéinémie

La plupart des dosages permettent de mesurer les taux d'homocystéine totale (tHcy) (fractions fixées aux protéines et conjuguées)<sup>13</sup> à jeun ou 4 à 6 heures après l'administration orale de méthionine (0,1 mg/kg).<sup>7</sup> La chromatographie liquide à haute pression, la méthode la plus courante, donne un coefficient de corrélation de 3 à 11 %.<sup>13</sup> Les échantillons doivent être placés immédiatement sur de la glace pour éviter toute élévation accidentelle des taux de tHcy.<sup>7</sup> De plus, les taux sont faussement bas au moment de la phase aiguë d'une maladie comme l'infarctus du myocarde (IM).<sup>14</sup> Les tests de dépistage actuels coûtent de 30 à 50 \$. Par contre, de nouvelles techniques de mesure des taux de tHcy moins coûteuses ont été mises au point<sup>15</sup> et devraient éventuellement être facilement accessibles.

Outre la prédisposition génétique, un certain nombre de facteurs font augmenter les taux plasmatiques de tHcy, y compris l'âge avancé, le fait d'être de sexe masculin et l'élévation des taux sériques de créatinine.<sup>5-7</sup> Les médicaments comme les antiépileptiques, le méthotrexate et l'oxyde nitreux,<sup>6</sup> de même que certains états pathologiques, comme le psoriasis, la leucémie lymphoblastique aiguë, le

cancer du sein et l'hypothyroïdie<sup>5,6</sup> font également augmenter les taux de tHcy, probablement en raison d'effets sur les taux de vitamines. L'homocystéine est en corrélation inverse avec les taux sériques de vitamine B<sub>6</sub>, de vitamine B<sub>12</sub> et de folates.<sup>10</sup> Ainsi, dans les populations où l'on observe une prévalence plus forte de carence en vitamine B<sub>12</sub>, par exemple chez les gens âgés,<sup>16</sup> la spécificité du taux de tHcy plasmatique en tant que facteur de risque cardiaque pourrait se trouver réduite.

## Lien entre homocystéine et risque coronarien

### Études rétrospectives

Plus de 30 études cas-témoins ont comparé les taux de tHcy de patients atteints de coronaropathie à ceux de témoins en bonne santé.<sup>17-46</sup> Les patients atteints de coronaropathie présentaient des taux plasmatiques de tHcy à jeun significativement plus élevés dans 22 études sur 27<sup>18-39</sup> (coefficient de probabilité [CP] 1,2-10,9 après ajustement pour tenir compte d'autres facteurs de risque cardiaque). Après l'administration de méthionine, les taux étaient également plus élevés chez les patients atteints de coronaropathie dans 8 études sur 9<sup>35-42</sup> (CP ajusté 1,3-6,7).<sup>35,43</sup> La mesure des taux sériques a donné des résultats similaires.<sup>17,40</sup> De plus, 2 méta-analyses de données rétrospectives<sup>11,47</sup> ont confirmé ces résultats : les coefficients de probabilité touchant la maladie coronarienne associée à l'élévation des taux plasmatiques de tHcy étaient de 1,7 (intervalle de confiance [IC] à 95 % 1,5-1,9) et 6,14 (IC à 95 % 2,74-13,73). Le rapport entre les taux de tHcy et le nombre de coronaires obstruées ne s'est pas révélé constant.<sup>17,30-32</sup>

Il est possible qu'un autre facteur puisse prédisposer à la maladie coronarienne et à l'hyperhomocystéinémie. Comme prévu, les facteurs de risque cardiaque s'observaient plus fréquemment chez les patients atteints de coronaropathie. Certains biais liés à l'état de santé des volontaires ont pu amplifier cette différence car les participants aux essais cliniques ont tendance à mieux se porter et à être exposés à un moins grand nombre de facteurs de risque que la population en général. Certains comportements sains, comme une faible consommation de caféine<sup>48</sup> et le recours à des multivitamines,<sup>10,35</sup> sont inversement liés aux taux plasmatiques de tHcy. L'homocystéine pourrait être associée à des facteurs de risque comme le tabagisme,<sup>35,37</sup> l'hypertension,<sup>32-35</sup> la dyslipidémie<sup>27-29,35</sup> et l'hyperglycémie;<sup>49</sup> en revanche, elle semble exercer un effet indépendant<sup>33-38</sup> et pourrait même interagir avec d'autres facteurs qui influent sur le risque coronarien.<sup>19,35</sup> Dans une étude, l'ajustement pour tenir compte du taux plasmatique de fibrinogène a aboli le lien entre tHcy et maladie coronarienne.<sup>17</sup> Le lien entre tHcy et d'autres facteurs de risque non conventionnels est inconnu. Des études rétrospectives peuvent ainsi mettre au jour certains rapports, mais ne permettent pas d'établir formellement un lien de cause à effet.

## Études prospectives

Huit études cas-témoins nichées dans des études prospectives ont permis d'évaluer le lien entre le taux de tHcy et la survenue d'un premier accident coronarien majeur<sup>47,50-55</sup> ou d'angine *de novo* nécessitant un pontage coronarien.<sup>56</sup> Malheureusement, ces études donnent des résultats divergents. Les décès des suites d'un IM ou d'origine coronarienne ont été associés à des taux plus élevés de tHcy dans seulement 4 études sur 7<sup>47,50-52</sup> et l'ajustement pour tenir compte de la prévalence de la maladie coronarienne a atténué ce rapport dans une étude.<sup>52</sup> Selon l'essai clinique MRFIT,<sup>54</sup> une minorité de patients ayant déjà présenté des accidents coronariens avaient suffisamment de plasma congelé pour que l'on puisse mesurer leurs taux de tHcy. Ainsi, dans de nombreux cas, le tHcy plasmatique a peut-être été mesuré trop longtemps à l'avance. Contrairement aux accidents coronariens majeurs, l'angine n'a pas été associée aux taux plasmatiques de tHcy.<sup>56</sup>

Selon des études de cohorte prospectives, le tHcy pourrait représenter un facteur de risque plus grave d'accident coronarien majeur chez les patients qui souffrent déjà de maladie coronarienne. Dans 2 études,<sup>57,58</sup> les accidents coronariens sont survenus plus souvent chez les hommes présentant une hyperhomocystéinémie que chez ceux dont les taux de tHcy étaient normaux; cependant, l'ajustement pour tenir compte de la prévalence de la maladie coronarienne au départ a atténué ce rapport. Par contre, les taux de tHcy non à jeun ont été indépendamment associés à la mortalité cardiovasculaire (risque relatif [RR] 1,52, IC 95 % 1,16-1,98) et à la mortalité globale (RR 1,54, IC 95 % 1,31-1,82) chez des hommes et des femmes âgés de la cohorte originale de l'étude Framingham.<sup>59</sup> Les preuves les plus concluantes nous viennent de Nygård et ses collaborateurs<sup>60</sup> qui ont suivi de façon prospective 587 patients qui présentaient une sténose significative à la coronarographie. Un lien dose-réponse entre les taux d'homocystéine au départ, la mortalité coronarienne et la mortalité globale a pu être observé (Tableau 1). Le même

phénomène a été noté chez des patients souffrant d'autres formes d'athérosclérose.<sup>61</sup>

Les preuves tirées des études prospectives donnent à penser que l'homocystéine agit en favorisant les accidents thrombo-emboliques aigus. Peu d'études prospectives ont évalué le rôle de l'homocystéine dans la progression chronique de l'athérosclérose. Dans l'étude *Shunt Occlusion Trial*,<sup>62</sup> le taux d'occlusion des greffons 1 an après le pontage coronarien n'a pas été relié au taux préopératoire de tHcy. Par contre, les anomalies athéroscléreuses induites par la tHcy pourraient évoluer sur plus d'une année. En résumé, selon des preuves concluantes, le taux plasmatique de tHcy serait un facteur de risque d'accident coronarien aigu chez les patients qui souffrent déjà de maladie vasculaire.

## Lien entre prédisposition génétique à l'hyperhomocystéinémie et maladie coronarienne

L'homozygotisme à l'égard d'une mutation affectant le gène de la 5,10-méthylène tétrahydrofolate-réductase (MTHFR), qui participe au métabolisme de l'homocystéine, s'observe chez 4 à 14 % de la population générale<sup>2</sup> et est associée à l'élévation des taux plasmatiques de tHcy<sup>63-67</sup> en présence de taux de folates anormaux.<sup>63-66</sup> L'importance de cette mutation dans l'installation de la maladie coronarienne pourrait dépendre de la population. Des études menées chez des Japonais ont toujours fait état d'une forte prévalence de la mutation chez les patients atteints de coronaropathie,<sup>68-71</sup> alors que seule une minorité d'études portant sur des gens de race blanche ont mentionné ce lien.<sup>24,36</sup> En outre, un rapport entre le génotype de la MTHFR et le nombre de vaisseaux oblitérés à la coronarographie a pu être observé chez les patients japonais,<sup>68</sup> mais non chez les patients de race blanche.<sup>72-74</sup> Aucun lien n'a été démontré entre la mutation et d'autres facteurs de risque, y compris les antécédents familiaux de maladie coronarienne précoce.<sup>73-75</sup>

**Tableau 1 : Lien entre les taux plasmatiques d'homocystéine totale (tHcy), la mortalité globale et la mortalité d'origine coronarienne**

| Taux plasmatique de tHcy, µmol/L | N <sup>bre</sup> de sujets<br>n = 587 | Taux de mortalité globale, % | Risque relatif (et IC 95 %) |                               |
|----------------------------------|---------------------------------------|------------------------------|-----------------------------|-------------------------------|
|                                  |                                       |                              | Décès*                      | Décès d'origine coronarienne† |
| < 9                              | 130                                   | 3,8                          | 1,0                         | 1,0                           |
| 9-14,9                           | 372                                   | 9,9                          | 1,9 (0,7-5,1)               | 2,3 (0,7-7,7)                 |
| 15-19,9                          | 59                                    | 25,4                         | 2,8 (0,9-9,0)               | 2,5 (0,6-10,5)                |
| ≥ 20                             | 26                                    | 26,9                         | 4,5 (1,2-16,6)              | 7,8 (1,7-35,1)                |

Source : Abrégé de Nygård et coll.<sup>60</sup>

Note : IC = intervalle de confiance.

\*Dose ajustée pour tenir compte de l'âge, du sexe, de la fraction d'éjection ventriculaire gauche, du taux de créatinine, du taux de cholestérol total, de l'étendue de la maladie coronarienne, du traitement de l'hypertension, des antécédents de diabète et de tabagisme, de la numération plaquettaire et du recours à l'AAS.

†Ajusté pour tenir compte de l'âge, du sexe, de la fraction d'éjection ventriculaire gauche, du taux de créatinine, du taux de cholestérol total et de l'étendue de la maladie coronarienne; p pour tendance = 0,01.

Dans une méta-analyse regroupant près de 5000 patients ayant pris part à 8 études cliniques, la mutation homozygote a été associée à un risque accru de maladie coronarienne (CP 1,22, IC 95 % 1,01–1,47).<sup>67</sup> Par contre, une méta-analyse plus grande encore, regroupant 23 études, n'a pas réussi à faire ressortir ce type de lien entre le génotype de la MTHFR et la maladie coronarienne (CP 1,11, IC 95 % 0,91–1,37) ou quelque autre paramètre cardiovasculaire (CP 1,12, IC 95 % 0,92–1,37).<sup>76</sup> Une étude japonaise a montré que la prévalence de la mutation de la MTHFR diminuait avec l'âge. Cette observation donne à penser que la mutation pourrait favoriser la mort précoce d'origine cardiovasculaire.<sup>77</sup> Par contre, la mutation ne semble pas associée à la longévité chez les gens de race blanche (CP 0,87, IC 95 % 0,69–1,11).<sup>78</sup> À la lumière de ces observations, il a été suggéré que d'autres anomalies génétiques ou facteurs de risque puissent interagir avec la mutation de la MTHFR et faire augmenter le risque cardiovasculaire.<sup>79</sup>

### Lien entre les taux sériques de folates, de vitamine B<sub>6</sub> ou de vitamine B<sub>12</sub> et le risque d'accident coronarien

L'homocystéine peut être un simple marqueur non spécifique d'une carence vitaminique. Plusieurs études ont identifié un rapport inverse entre les taux sériques de folates et les accidents coronariens à l'analyse univariée. Par contre, l'ajustement pour tenir compte des taux plasmatiques de tHcy a atténué cet effet.<sup>80–82</sup> Les taux sériques de vitamines B<sub>12</sub> n'ont aucun lien avec la maladie coronarienne; en revanche, la vitamine B<sub>6</sub> pourrait être un facteur de risque indépendant. Robinson et ses collaborateurs<sup>82</sup> ont

observé chez les patients dont les taux de vitamine B<sub>6</sub> sont bas la présence d'un risque accru de maladie coronarienne (CP 1,84, IC 95 % 1,39–2,42), risque qui s'est maintenu après ajustement pour tenir compte des taux plasmatiques de tHcy. De même, l'homocystéine est restée un facteur de prédiction important de la maladie coronarienne après correction des taux sériques de vitamines.<sup>60,82</sup>

### Effet du traitement vitaminique

Plusieurs essais contrôlés randomisés ont mesuré l'effet des suppléments multivitaminiques sur les taux de tHcy à jeun. Tous les schémas thérapeutiques, y compris un traitement d'acide folique (1–5 mg), de vitamine B<sub>6</sub> (5–50 mg) et de vitamine B<sub>12</sub> (0,02–1 mg) en association, ont fait diminuer de 20 à 50 % les taux plasmatiques de tHcy.<sup>83–88</sup> La réponse des patients coronariens au traitement a été équivalente à celle des témoins en bonne santé.<sup>84</sup> Une méta-analyse<sup>89</sup> regroupant 12 études auxquelles ont participé 1114 patients en tout, a révélé que l'acide folique (0,4–5 mg) faisait diminuer les taux de tHcy de 25 % en moyenne indépendamment de la présence ou non de maladie vasculaire, alors que l'augmentation des taux plasmatiques de tHcy et la baisse des taux sériques de folates rehaussaient cet effet. L'ajout de vitamine B<sub>12</sub>, et non de vitamine B<sub>6</sub>, a donné lieu à une baisse supplémentaire d'environ 7 % des taux de tHcy à jeun (IC 95 %, 3–10 %). L'acide folique a produit son effet maximum à 0,5 mg/j; par contre, 0,2 mg pourraient suffire à normaliser les taux de tHcy à jeun chez certains patients.<sup>90,91</sup> Les doses moindres, de 0,1 mg par exemple, semblent inefficaces.<sup>91,92</sup>

Si la vitamine B<sub>6</sub> exerce peu d'effets sur les taux plasmatiques de tHcy à jeun, des études non contrôlées ont con-

**Tableau 2 : Tableau sommaire des recommandations (dépistage et traitement de l'hyperhomocystéinémie)**

| Intervention                                    | Efficacité                                                                                                                                                                                                                                                                                     | Niveau de preuve*                                                                                                                                | Recommandation*                                                                                                                          |
|-------------------------------------------------|------------------------------------------------------------------------------------------------------------------------------------------------------------------------------------------------------------------------------------------------------------------------------------------------|--------------------------------------------------------------------------------------------------------------------------------------------------|------------------------------------------------------------------------------------------------------------------------------------------|
| <b>Dosage des taux plasmatiques de tHcy†</b>    | Les techniques actuellement offertes pour mesurer les taux de tHcy ont un coefficient de variation de 2–11 %. Les tests sont restreints aux centres de recherche.                                                                                                                              |                                                                                                                                                  |                                                                                                                                          |
| Population en général                           | Un lien entre les taux de tHcy et le risque coronarien a été démontré (la majorité des études ont mesuré les taux de tHcy à jeun). Par contre, l'effet du dépistage sur le pronostic est inconnu.                                                                                              | Études de cohorte <sup>59</sup> et cas-témoins <sup>17–42,47,50–52</sup> (II-2)                                                                  | Les preuves sont insuffisantes pour recommander le dépistage de l'hyperhomocystéinémie dans la population en général (catégorie C).      |
| Population exposée à un risque coronarien élevé | Des études prospectives ont montré un lien plus constant entre les taux de tHcy et les accidents coronariens chez les patients souffrant déjà de maladie coronarienne. Encore une fois, l'effet du dépistage sur le pronostic est inconnu.                                                     | Études de cohorte <sup>57–61</sup> et cas-témoins <sup>17–42,50,52</sup> (II-2)                                                                  | Les preuves sont insuffisantes pour recommander le dépistage de l'hyperhomocystéinémie dans les populations à haut risque (catégorie C)‡ |
| <b>Traitement vitaminique</b>                   | Le traitement à l'acide folique (seul ou avec vitamine B <sub>12</sub> ) abaisse efficacement les taux plasmatiques de tHcy, alors que la vitamine B <sub>6</sub> abaisse les taux post-méthionine. Aucune étude sur l'effet du traitement sur le pronostic clinique n'a encore été complétée. | Essais randomisés contrôlés <sup>89,96–99</sup> (I), étude de cohorte <sup>100</sup> (II-2) et études non contrôlées <sup>90–95,101</sup> (II-3) | Les preuves sont insuffisantes pour recommander le traitement vitaminique dans l'hyperhomocystéinémie (catégorie C)§                     |



firmé son utilité dans le traitement de l'hyperhomocystéinémie après l'administration de méthionine. Les taux de tHcy post-méthionine ont diminué de 21 à 42 % après le traitement à la vitamine B<sub>6</sub> (50–250 mg).<sup>93,94</sup> Chez les patients qui répondent plus ou moins à la vitamine B<sub>6</sub> (jusqu'à 25 %<sup>94</sup>), l'acide folique pourrait être efficace. Pour la majorité des patients, 6 semaines de monothérapie ou de polythérapie suffisent pour normaliser les taux de tHcy.<sup>95</sup>

Dans une étude regroupant des jeunes femmes, des folates provenant de source alimentaire naturelle ou d'aliments enrichis ont exercé sur les taux plasmatiques de tHcy le même effet (réduction de 12–21 %) que des doses équivalentes de suppléments vitaminiques.<sup>96</sup> Toutefois, chez des hommes et des femmes d'âge moyen, des céréales pour petit-déjeuner enrichies de 666 µg d'acide folique par jour ont exercé un effet modeste sur les taux de tHcy à jeun (ré-

duction de 10–14 %),<sup>97–99</sup> indépendamment de l'ajout ou non de vitamine B<sub>6</sub>, de vitamine B<sub>12</sub> ou d'autres micronutriments.<sup>98</sup> Ainsi, la recommandation actuelle de la *Food and Drug Administration* des États-Unis d'enrichir les produits céréaliers de 140 µg d'acide folique par portion de 100 g pourrait se révéler insuffisante pour normaliser les taux élevés d'homocystéine.<sup>99</sup>

## Prévention de la maladie coronarienne

On ignore encore si l'abaissement des taux plasmatiques d'homocystéine peut prévenir les accidents coronariens parce qu'on ne dispose encore d'aucune étude randomisée contrôlée à longue échéance mesurant des paramètres de résultats appropriés. Selon certaines données épidémiologiques, la prise de folates et de vitamine B<sub>6</sub> pourrait

**Tableau 3 : Sources alimentaires d'acide folique, de vitamine B<sub>6</sub> et de vitamine B<sub>12</sub>**

| Nutriment                | Dose quotidienne recommandée       | Apport alimentaire quotidien chez l'adulte | Sources alimentaires                                                                                                                                                      |
|--------------------------|------------------------------------|--------------------------------------------|---------------------------------------------------------------------------------------------------------------------------------------------------------------------------|
| Acide folique            | Femmes : 180 µg<br>Hommes : 200 µg | 200–300 µg                                 | Légumes verts (p. ex., épinards, brocoli), légumineuses (p. ex., lentilles, pois chiches, fèves de Lima), jus d'orange, oranges, céréales, pain, germe de blé             |
| Vitamine B <sub>6</sub>  | 1,6 mg                             | 1,5 mg                                     | Viande, volaille, poisson, légumes verts, légumineuses, graines, pommes de terre, cantaloup, lait, jaunes d'œufs, céréales et grains, blé, germe de blé                   |
| Vitamine B <sub>12</sub> | 2,4 µg                             | 4–8 µg                                     | Bœuf, volaille, poisson (particulièrement crabe, huîtres, saumon, hareng), foie, rognons, soja, jus de fruits, produits laitiers, jaunes d'œufs, céréales enrichies, pain |

**Tableau 4 : Essais randomisés sur des interventions hypocystéinémiantes actuellement en cours**

| Étude                                                                                        | Population                                                            | Date du début | Taille de l'échantillon |
|----------------------------------------------------------------------------------------------|-----------------------------------------------------------------------|---------------|-------------------------|
| Bergen Vitamin Study                                                                         | AVC (Norvège)                                                         | 1997          | 2 000                   |
| Cambridge Heart Antioxidant Study (CHAOS-2)                                                  | IM, angine instable (Royaume-Uni)                                     | 1998          | 4 000                   |
| Heart Outcomes Prevention Evaluation (HOPE-2) Study                                          | Maladie vasculaire artérielle (Canada)                                | 1999          | 5 000                   |
| Norwegian Study of Homocysteine Lowering with B-Vitamins in Myocardial Infarction (NORVIT)   | IM (Norvège)                                                          | 1998          | 3 000                   |
| Prevention with a Combined Inhibitor and Folate in Coronary Heart Disease (PACIFIC) Study    | Maladie vasculaire artérielle (Australie)                             | 1998          | 10 000                  |
| Study of the Effectiveness of Additional Reductions in Cholesterol and Homocysteine (SEARCH) | IM (Royaume-Uni)                                                      | 1998          | 12 000                  |
| Vitamins in Stroke Prevention (VISP) Trial                                                   | AVC (États-Unis)                                                      | 1998          | 3 600                   |
| VITamins TO Prevent Stroke Study (VITATOPS)                                                  | AVC (Australie)                                                       | 1999          | 5 000                   |
| Women's Antioxidant and Cardiovascular Disease Study (WACS)                                  | Maladie vasculaire ou risque élevé de maladie vasculaire (États-Unis) | 1998          | 8 000                   |

Note : IM = infarctus du myocarde.  
Source : abrégé de Eikelboom et coll.<sup>107</sup>

influer sur la survenue des accidents coronariens majeurs. Selon la *Nurses' Health Study*,<sup>100</sup> les femmes qui ont consommé plus de 400 µg de folates ou 3 mg de vitamine B<sub>6</sub> par jour étaient exposées à un risque moindre de maladie cardiaque que celles qui en avaient pris moins (RR ajusté 0,69 pour les folates, IC 95 %, 0,55–0,87 et 0,67 pour la vitamine B<sub>6</sub>, IC 95 %, 0,53–0,85). En outre, une étude non contrôlée a révélé que les plaques d'athérome présentes dans certaines portions d'artères carotides avaient régressé chez 38 patients souffrant d'hyperhomocystéinémie qui avaient reçu des doses quotidiennes d'acide folique (2,5–5 mg), de vitamine B<sub>6</sub> (25 mg) et de vitamine B<sub>12</sub> (250 µg) sur une période de quatre ans.<sup>101</sup> De même, dans une autre étude, des patients présentant de l'homocystinurie et qui avaient reçu une dose minimum d'acide folique (5 mg) et de vitamine B<sub>6</sub> (100–200 mg) ont présenté moins d'accidents vasculaires (RR 0,09, IC 95 %, 0,02–0,38) comparativement aux patients qui n'avaient pas été traités.<sup>102</sup> Bien que frappantes, les conclusions de cette dernière étude ne peuvent être appliquées à la population générale en raison de différences propres aux patients et d'autres facteurs méthodologiques.

## Recommandations

### Recommandations du Groupe d'étude canadien sur les soins de santé préventifs

Les recommandations du Groupe d'étude sont résumées au Tableau 2. On ne dispose pas de suffisamment de preuves pour y inclure ou y exclure le dosage des taux de tHcy quelle que soit la population (recommandation de catégorie C). Ce dosage aurait l'avantage de permettre l'identification des patients exposés à un risque coronarien élevé et le cas échéant, les autres facteurs de risque pourraient alors être traités de façon plus énergique. Par contre, le dosage de l'homocystéine en laboratoire est actuellement restreint aux centres de recherche. En outre, ce test n'est pas encore pris en charge par les régimes provinciaux d'assurance-maladie et, par conséquent, les patients peuvent devoir en assumer les coûts.

Bien que l'acide folique abaisse efficacement les taux plasmatiques de tHcy, on ne dispose pas de preuves suffisantes pour laisser entendre que son emploi permettrait de prévenir les complications coronariennes (recommandation de catégorie C). Le respect des doses quotidiennes recommandées de folates, de vitamine B<sub>6</sub> et de vitamine B<sub>12</sub> de source alimentaire (Tableau 3) pourrait prévenir l'hyperhomocystéinémie imputable à une carence vitaminique. Une fois l'hyperhomocystéinémie confirmée, il faut écarter la carence vitaminique pour pouvoir administrer le traitement qui s'impose afin de prévenir les complications, par exemple, les séquelles neurologiques d'une carence en vitamine B<sub>12</sub>. Certaines autorités recommandent de restreindre l'administration d'acide folique à 1 mg/j<sup>103,104</sup> ou d'ajouter des doses plus fortes de vitamine B<sub>12</sub> (0,2–1 mg/j)<sup>105</sup> à cause

du risque théorique associé à la découverte d'une carence occulte en vitamine B<sub>12</sub>.<sup>103</sup>

### Recommandations d'autres groupes

Les Directives de l'*American Heart Association*<sup>104</sup> précisent qu'il pourrait être raisonnable de procéder à un dosage de la tHcy chez les gens qui sont exposés à un risque d'hyperhomocystéinémie (p. ex., les personnes atteintes d'insuffisance rénale) ou chez ceux qui ont des antécédents personnels ou familiaux d'athérosclérose précoce. Plusieurs experts du domaine s'entendent à ce sujet<sup>5,105,106</sup> et suggèrent de ramener les taux de tHcy à jeun sous la barre des 10 µmol/L.<sup>105</sup> Si le traitement diététique initial se révèle inefficace, on peut recourir à des suppléments ou alors à des aliments enrichis renfermant au moins 400 µg d'acide folique, 2 mg de vitamine B<sub>6</sub> et 6 µg de vitamine B<sub>12</sub>.

### Les visées de la recherche

Des essais randomisés à grande échelle sont en cours pour évaluer l'effet du traitement à l'acide folique sur les complications cardiovasculaires<sup>107</sup> (Tableau 4). Ils devraient ainsi fournir les preuves sur lesquelles baser les recommandations relatives au traitement de l'hyperhomocystéinémie. La dose et le schéma vitaminiques optimum et le rôle du test à la méthionine pour le diagnostic de cette anomalie doivent être clarifiés. Bien que l'acide folique de source alimentaire seul puisse suffire à normaliser les taux de tHcy élevés, les gens qui prennent peu de folates sont plus sujets à l'hyperhomocystéinémie. La plupart des farines et produits céréaliers consommés par les Canadiens relèvent de la production domestique où l'ajout d'acide folique est facultatif. Il sera nécessaire de revoir les politiques qui s'appliquent aux aliments enrichis à mesure que nos connaissances sur la prévention et le traitement de l'hyperhomocystéinémie progresseront.

Nous tenons à remercier le Dr Jacques Genest, de l'Institut de recherches cliniques de Montréal, à Montréal, et le Dr Killian Robinson, du département de cardiologie de la Cleveland Clinic Foundation, à Cleveland, d'avoir accepté de passer en revue l'ébauche de ce document. Les opinions exprimées dans ce rapport sont celles des auteurs et du Groupe d'étude canadien sur les soins de santé préventifs et n'engagent en rien les examinateurs.

Intérêts concurrents : Aucun déclaré.

## Références

1. *Causes de décès, 1995*. Ottawa : Statistique Canada; 1997. N° de cat 84-208-XPB.
2. Brophy JM. The epidemiology of acute myocardial infarction and ischemic heart disease in Canada : data from 1976 to 1991. *Can J Cardiol* 1997;13:474-8.
3. Skovby F. Inborn errors of metabolism causing homocysteinemia and related vascular involvement. *Haemostasis* 1989;19(Suppl 1):4-9.
4. Mudd SH, Skovby F, Levy HL, Pettigrew KD, Wilcken B, Pyeritz RE, et al. The natural history of homocystinuria due to cystathionine b-synthase deficiency. *Am J Hum Genet* 1985;37:1-31.
5. Moghadasian MH, McManus BM, Frohlich JJ. Homocyst(e)ine and coronary artery disease. Clinical evidence and genetic and metabolic background. *Arch Intern Med* 1997;157:2299-308.
6. Mayer EL, Jacobsen DW, Robinson K. Homocysteine and coronary atherosclerosis. *J Am Coll Cardiol* 1996;27:517-27.

7. Refsum H, Ueland PM, Nygård O, Vollset SE. Homocysteine and cardiovascular disease. *Annu Rev Med* 1998;49:31-62.
8. Ray JG. Meta-analysis of hyperhomocysteinemia as a risk factor for venous thromboembolic disease. *Arch Intern Med* 1998;158:2101-6.
9. Eichinger S, Stimpflen A, Hirschl M, Bialonczyk C, Herkner K, Stain M, et al. Hyperhomocysteinemia is a risk factor of recurrent venous thromboembolism. *Thromb Haemost* 1998;80:566-9.
10. Selhub J, Jacques PF, Wilson PWF, Rush D, Rosenberg IH. Vitamin status and intake as primary determinants of homocysteinemia in an elderly population. *JAMA* 1993;270:2693-8.
11. Boushey CJ, Beresford SAA, Omenn GS, Motulsky AG. A quantitative assessment of plasma homocysteine as a risk factor for vascular disease. Probable benefits of increasing folic acid intakes. *JAMA* 1995;274:1049-57.
12. Woolf SH, Battista RN, Anderson GM, Logan AG, Wang E, and the Canadian Task Force on the Periodic Health Examination. Assessing the clinical effectiveness of preventive maneuvers: analytic principles and systematic methods in reviewing evidence and developing clinical practice recommendations. *J Clin Epidemiol* 1990;43:891-905.
13. Ueland PM, Refsum H, Stabler SP, Malinow MR, Andersson A, Allen RH. Total homocysteine in plasma or serum: methods and clinical applications. *Clin Chem* 1993;39:1964-79.
14. Egerton W, Silberberg J, Crooks R, Ray C, Xie L, Dudman N. Serial measures of plasma homocyst(e)ine after acute myocardial infarction. *Am J Cardiol* 1996;77:759-64.
15. Frantzen F, Faaren AL, Alfheim I, Nordhei AK. Enzyme conversion immunoassay for determining total homocysteine in plasma or serum. *Clin Chem* 1998;44:311-6.
16. Lindenbaum J, Rosenberg IH, Wilson PWF, Stabler SP, Allen RH. Prevalence of cobalamin deficiency in the Framingham elderly population. *Am J Clin Nutr* 1994;60:2-11.
17. von Eckardstein A, Malinow MR, Upson B, Heinrich J, Schulte H, Schonfeld R, et al. Effects of age, lipoproteins, and hemostatic parameters on the role of homocyst(e)inemia as a cardiovascular risk factor in men. *Arterioscler Thromb* 1994;14:460-4.
18. Olszewski AJ, Szostak WB. Homocysteine content of plasma proteins in ischemic heart disease. *Atherosclerosis* 1988;69:109-13.
19. Genest J Jr, McNamara JR, Salem DN, Wilson PWF, Schaefer EJ, Malinow MR. Plasma homocyst(e)ine levels in men with premature coronary artery disease. *J Am Coll Cardiol* 1990;16:1114-9.
20. Kang SS, Wong PWK, Susmano A, Sora J, Norusis M, Ruggie N. Thermolabile methylenetetrahydrofolate reductase: an inherited risk factor for coronary artery disease. *Am J Hum Genet* 1991;48:536-45.
21. Robinson K, Mayer EL, Miller DP, Green R, van Lente F, Gupta A, et al. Hyperhomocysteinemia and low pyridoxal phosphate. Common and independent reversible risk factors for coronary artery disease. *Circulation* 1995;92:2825-30.
22. Aronow WS, Ahn C. Association between plasma homocysteine and coronary artery disease in older persons. *Am J Cardiol* 1997;80:1216-8.
23. Verhoef P, Stampfer MJ, Buring JE, Gaziano JM, Allen RH, Stabler SP, et al. Homocysteine metabolism and risk of myocardial infarction: relation with vitamins B6, B12, and folate. *Am J Epidemiol* 1996;143:845-59.
24. Malinow MR, Nieto FJ, Kruger WD, Duell PB, Hess DL, Gluckman RA, et al. The effects of folic acid supplementation on plasma total homocysteine are modulated by multivitamin use and methylenetetrahydrofolate reductase genotypes. *Arterioscler Thromb Vasc Biol* 1997;17:1157-62.
25. Christensen B, Frosst P, Lussier-Cacan S, Selhub J, Goyette P, Rosenblatt DS, et al. Correlation of a common mutation in the methylenetetrahydrofolate reductase gene with plasma homocysteine in patients with premature coronary artery disease. *Arterioscler Thromb Vasc Biol* 1997;17:569-73.
26. Schwartz SM, Siscovick DS, Malinow MR, Rosendaal FR, Beverly K, Hess DL, et al. Myocardial infarction in young women in relation to plasma total homocysteine, folate, and a common variant in the methylenetetrahydrofolate reductase gene. *Circulation* 1997;96:412-7.
27. Wu LL, Wu J, Hunt SC, James BC, Vincent GM, Williams RR, et al. Plasma homocyst(e)ine as a risk factor for early familial coronary artery disease. *Clin Chem* 1994;40:552-61.
28. Malinow MR, Ducimetiere P, Luc G, Evans AE, Arveiler D, Cambien F, et al. Plasma homocyst(e)ine levels and graded risk for myocardial infarction: findings in two populations at contrasting risk for coronary heart disease. *Atherosclerosis* 1996;126:27-34.
29. Loehrer FMT, Angst CP, Haefeli WE, Jordan PP, Ritz R, Fowler B. Low whole-blood S-adenosyl-methionine and correlation between 5-methyltetrahydrofolate and homocysteine in coronary artery disease. *Arterioscler Thromb Vasc Biol* 1996;16:727-33.
30. Kang SS, Wong PWK, Cook HY, Norusis M, Messer JV. Protein-bound homocyst(e)ine. A possible risk factor for coronary artery disease. *J Clin Invest* 1986;77:1482-6.
31. Ubink JB, Vermaak WJH, Bennett JM, Becker S, van Staden DA, Bissbort S. The prevalence of homocysteinemia and hypercholesterolemia in angiographically defined coronary heart disease. *Klin Wochenschr* 1991;69:527-34.
32. Montalescot G, Ankri A, Chadeaux-Vekemans B, Blacher J, Philippe F, Drobnicki G, et al. Plasma homocysteine and the extent of atherosclerosis in patients with coronary artery disease. *Int J Cardiol* 1997;60:295-300.
33. Dalery K, Lussier-Cacan S, Selhub J, Davignon J, Latour Y, Genest J Jr. Homocysteine and coronary artery disease in French Canadian subjects: relation with vitamins B12, B6, pyridoxal phosphate, and folate. *Am J Cardiol* 1995;75:1107-11.
34. Pancharuniti N, Lewis CA, Sauberlich HE, Perkins LL, Go RCP, Alvarez JO, et al. Plasma homocyst(e)ine, folate, and vitamin B-12 concentrations and risk for early-onset coronary artery disease. *Am J Clin Nutr* 1994;59:940-8.
35. Graham IM, Daly LE, Refsum HM, Robinson K, Brattström LE, Ueland PM, et al. Plasma homocysteine as a risk factor for vascular disease. The European Concerted Action Project. *JAMA* 1997;277:1775-81.
36. Kluijtmans LAJ, van den Heuvel LPW, Boers GHJ, Frosst P, Stevens EMB, van Oost BA, et al. Molecular genetic analysis in mild hyperhomocysteinemia: a common mutation in the methylenetetrahydrofolate reductase gene is a genetic risk factor for cardiovascular disease. *Am J Hum Genet* 1996;58:35-41.
37. Lolin YI, Sanderson JE, Cheng SK, Chan CF, Pang CP, Woo KS, et al. Hyperhomocysteinemia and premature coronary artery disease in the Chinese. *Heart* 1996;76:117-22.
38. Verhoef P, Kok FJ, Kruyssen DACM, Schouten EG, Witteman JCM, Grobbee DE, et al. Plasma total homocysteine, B vitamins, and risk of coronary atherosclerosis. *Arterioscler Thromb Vasc Biol* 1997;17:989-95.
39. Israelsson B, Brattström LE, Hultberg BL. Homocysteine and myocardial infarction. *Atherosclerosis* 1988;71:227-33.
40. Clarke R, Daly L, Robinson K, Naughten E, Cahalane S, Fowler B, et al. Hyperhomocysteinemia: an independent risk factor for vascular disease. *N Engl J Med* 1991;324:1149-55.
41. Wilcken DEL, Wilcken B. The pathogenesis of coronary artery disease. A possible role for methionine metabolism. *J Clin Invest* 1976;57:1079-82.
42. Murphy-Chutorian DR, Wexman MP, Grieco AJ, Heining JA, Glassman E, Gaull GE, et al. Methionine intolerance: a possible risk factor for coronary artery disease. *J Am Coll Cardiol* 1985;6:725-30.
43. Donner MG, Klein GK, Mathes PB, Schwandt P, Richter WO. Plasma total homocysteine levels in patients with early-onset coronary heart disease and a low cardiovascular risk profile. *Metabolism* 1998;47:273-9.
44. Wilcken DEL, Reddy SG, Gupta VJ. Homocysteinemia, ischemic heart disease, and the carrier state for homocystinuria. *Metabolism* 1983;32:363-70.
45. Schmitz C, Lindpaintner K, Verhoef P, Gaziano JM, Buring J. Genetic polymorphism of methylenetetrahydrofolate reductase and myocardial infarction. A case-control study. *Circulation* 1996;94:1812-4.
46. Kang S-S, Passen EL, Ruggie N, Wong PWK, Sora H. Thermolabile defect of methylenetetrahydrofolate reductase in coronary artery disease. *Circulation* 1993;88:1463-9.
47. Wald NJ, Watt HC, Law MR, Weir DG, McPartlin J, Scott JM. Homocysteine and ischemic heart disease. Results of a prospective study with implications regarding prevention. *Arch Intern Med* 1998;158:862-7.
48. Nygård O, Refsum H, Ueland PM, Vollset SE. Major lifestyle determinants of plasma total homocysteine distribution: the Hordaland Homocysteine Study. *Am J Clin Nutr* 1998;67:263-70.
49. Hoogeveen EK, Kostense PJ, Beks PJ, Mackaay AJC, Jakobs C, Bouter LM, et al. Hyperhomocysteinemia is associated with an increased risk of cardiovascular disease, especially in non-insulin-dependent diabetes mellitus: a population-based study. *Arterioscler Thromb Vasc Biol* 1998;18:133-8.
50. Stampfer MJ, Malinow MR, Willett WC, Newcomer LM, Upson B, Ullmann D, et al. A prospective study of plasma homocyst(e)ine and risk of myocardial infarction in US physicians. *JAMA* 1992;268:877-81.
51. Arnesen E, Refsum H, Bona KH, Ueland PM, Forde OH, Nordrehaug JE. Serum total homocysteine and coronary heart disease. *Int J Epidemiol* 1995;24:704-9.
52. Bots ML, Launer LJ, Lindemans J, Hoes AW, Hofman A, Witteman JCM, et al. Homocysteine and short-term risk of myocardial infarction and stroke in the elderly. The Rotterdam Study. *Arch Intern Med* 1999;159:38-44.
53. Folsom AR, Nieto FJ, McGovern PG, Tsai MY, Malinow MR, Eckfeldt JH, et al. Prospective study of coronary heart disease incidence in relation to fasting total homocysteine, related genetic polymorphisms, and B vitamins. The Atherosclerosis Risk in Communities (ARIC) Study. *Circulation* 1998;98:204-10.
54. Evans RW, Shaten J, Hempel JD, Cutler JA, Kuller LH, for the MRFIT Research Group. Homocyst(e)ine and risk of cardiovascular disease in the Multiple Risk Factor Intervention Trial. *Arterioscler Thromb Vasc Biol* 1997;17:1947-53.
55. Alftan G, Pekkanen J, Jauhiainen M, Pitkanieni J, Karvonen M, Tuomilehto J, et al. Relation of serum homocysteine and lipoprotein(a) concentrations to atherosclerotic disease in a prospective Finnish population based study. *Atherosclerosis* 1994;106:9-19.
56. Verhoef P, Hennekens CH, Allen RH, Stabler SP, Willett WC, Stampfer MJ. Plasma total homocysteine and risk of angina pectoris with subsequent coronary artery bypass surgery. *Am J Cardiol* 1997;79:799-801.
57. Ubink JB, Fehily AM, Pickering J, Elwood PC, Vermaak WJH. Homocysteine and ischaemic heart disease in the Caerphilly cohort. *Atherosclerosis* 1998;140:349-56.
58. Stehouwer CDA, Weijnenberg MP, van den Berg M, Jakobs C, Feskens EJM, Kromhout D. Serum homocysteine and risk of coronary heart disease and



- cerebrovascular disease in elderly men: a 10-year follow-up. *Arterioscler Thromb Vasc Biol* 1998;18:1895-901.
59. Bostom A, Silbershatz H, Rosenberg IH, Selhub J, D'Agostino RB, Wolf PA, et al. Nonfasting plasma total homocysteine levels and all-cause and cardiovascular disease mortality in elderly Framingham men and women. *Arch Intern Med* 1999;159:1077-80.
  60. Nygård O, Nordrehaug JE, Refsum H, Ueland PM, Farstad M, Vollset SE. Plasma homocysteine levels and mortality in patients with coronary artery disease. *N Engl J Med* 1997;337:230-6.
  61. Taylor LM Jr, Moneta GL, Sexton GJ, Schuff RA, Porter JM, and the Homocysteine and Progression of Atherosclerosis Study Investigators. Prospective blinded study of the relationship between plasma homocysteine and progression of symptomatic peripheral arterial disease. *J Vasc Surg* 1999;29:8-21.
  62. Eritsland J, Arnesen H, Seljeflot I, Abdelnoor M, Gronseth K, Berg K, et al. Influence of serum lipoprotein(a) and homocyst(e)ine levels on graft patency after coronary artery bypass grafting. *Am J Cardiol* 1994;74:1099-102.
  63. Verhoef P, Kok FJ, Kluijtmans LAJ, Blom HJ, Refsum H, Ueland PM, et al. The 677C>T mutation in the methylenetetrahydrofolate reductase gene: associations with plasma total homocysteine levels and risk of coronary atherosclerotic disease. *Atherosclerosis* 1997;132:105-13.
  64. Girelli D, Friso S, Trabetti E, Olivieri O, Russo C, Pessotto R, et al. Methylenetetrahydrofolate reductase C677T mutation, plasma homocysteine, and folate in subjects from northern Italy with or without angiographically documented severe coronary atherosclerotic disease: evidence for an important genetic-environmental interaction. *Blood* 1998;91:4158-63.
  65. Verhoeff BJ, Trip MD, Prins MH, Kastelein JJP, Reitsma PH. The effect of a common methylenetetrahydrofolate reductase mutation on levels of homocysteine, folate, vitamin B12 and on the risk of premature atherosclerosis. *Atherosclerosis* 1998;141:161-6.
  66. Thuillier L, Chadeaux-Vekemans B, Bonnefont JP, Kara A, Aupetit J, Rochette C, et al. Does the polymorphism 677C-T of the 5,10-methylenetetrahydrofolate reductase gene contribute to homocysteine-related vascular disease? *J Inherit Metab Dis* 1998;21:812-22.
  67. Kluijtmans LAJ, Kastelein JJP, Lindemans J, Boers GHJ, Heil SG, Brusckhe AVG, et al. Thermolabile methylenetetrahydrofolate reductase in coronary artery disease. *Circulation* 1997;96:2573-7.
  68. Morita H, Taguchi J, Kurihara H, Kitaoka M, Kaneda H, Kurihara Y, et al. Genetic polymorphism of 5,10-methylenetetrahydrofolate reductase (MTHFR) as a risk factor for coronary artery disease. *Circulation* 1997;95:2032-6.
  69. Ou T, Yamakawa-Kobayashi K, Arinami T, Amemiya H, Fujiwara H, Kawata K, et al. Methylenetetrahydrofolate reductase and apolipoprotein E polymorphisms are independent risk factors for coronary heart disease in Japanese: a case-control study. *Atherosclerosis* 1998;137:23-8.
  70. Izumi M, Iwai N, Ohmichi N, Nakamura Y, Shimoike H, Kinoshita M. Molecular variant of 5,10-methylenetetrahydrofolate reductase is a risk factor of ischemic heart disease in the Japanese population. *Atherosclerosis* 1996;121:293-4.
  71. Morita H, Kurihara H, Sugiyama T, Hamada C, Kurihara Y, Shindo T, et al. Polymorphism of the methionine synthase gene. Association with homocysteine metabolism and late-onset vascular diseases in the Japanese population. *Arterioscler Thromb Vasc Biol* 1999;19:298-302.
  72. Wilcken DEL, Wang XL, Sim AS, McCredie RM. Distribution in healthy and coronary populations of the methylenetetrahydrofolate reductase (MTHFR) C677 T mutation. *Arterioscler Thromb Vasc Biol* 1996;16:878-82.
  73. Brugada R, Marian AJ. A common mutation in methylenetetrahydrofolate reductase gene is not a major risk of coronary artery disease or myocardial infarction. *Atherosclerosis* 1997;128:107-12.
  74. Van Bockxmeer FM, Mamotte CDS, Vasikaran SD, Taylor RR. Methylenetetrahydrofolate reductase gene and coronary artery disease. *Circulation* 1997;95:21-3.
  75. Anderson JL, King GJ, Thomson MJ, Todd M, Bair TL, Muhlestein JB, et al. A mutation in the methylenetetrahydrofolate reductase gene is not associated with increased risk for coronary artery disease or myocardial infarction. *J Am Coll Cardiol* 1997;30:1206-11.
  76. Brattström LE, Wilcken DEL, Öhrvik J, Brudin L. Common methylenetetrahydrofolate reductase gene mutation leads to hyperhomocysteinemia but not to vascular disease. The result of a meta-analysis. *Circulation* 1998;98:2520-6.
  77. Matsushita S, Muramatsu T, Arai H, Matsui T, Higuchi S. The frequency of the methylenetetrahydrofolate reductase-gene mutation varies with age in the normal population. *Am J Hum Genet* 1997;61:1459-60.
  78. Brattström LE, Zhang Y, Hurtig M, Refsum H, Östensson S, Fransson L, et al. A common methylenetetrahydrofolate reductase gene mutation and longevity. *Atherosclerosis* 1998;141:315-9.
  79. Refsum H, Ueland PM. Recent data are not in conflict with homocysteine as a cardiovascular risk factor. *Curr Opin Lipidol* 1998;9:533-9.
  80. Morrison HI, Schaubel D, Desmeules M, Wigle DT. Serum folate and risk of fatal coronary heart disease. *JAMA* 1996;275:1893-6.
  81. Chason-Taber L, Selhub J, Rosenberg IH, Malinow MR, Terry P, Tishler PV, et al. A prospective study of folate and vitamin B6 and risk of myocardial infarction in US physicians. *J Am Coll Nutr* 1996;15:136-43.
  82. Robinson K, Arheart K, Refsum H, Brattström L, Boers G, Ueland P, et al, for the European COMAC group. Low circulating folate and vitamin B6 concentrations. Risk factors for stroke, peripheral vascular disease, and coronary artery disease. *Circulation* 1998;97:437-43.
  83. den Heijer M, Brouwer IA, Bos GMJ, Blom HJ, van der Put NMJ, Spaans AP, et al. Vitamin supplementation reduces blood homocysteine levels. A controlled trial in patients with venous thrombosis and healthy volunteers. *Arterioscler Thromb Vasc Biol* 1998;18:356-61.
  84. Woodside JV, Yarnell JWG, McMaster D, Young IS, Harmon DL, McCrum EE, et al. Effect of B-group vitamins and antioxidant vitamins on hyperhomocysteinemia: a double-blind, randomized, factorial-design, controlled trial. *Am J Clin Nutr* 1998;67:858-66.
  85. Naurath HJ, Joosten E, Riezler R, Stabler SP, Allen RH, Lindenbaum J. Effects of vitamin B12, folate, and vitamin B6 supplements in elderly people with normal serum vitamin concentrations. *Lancet* 1995;346:85-9.
  86. Ubbink JB, van der Merwe A, Vermaak WHJ, Delport R. Hyperhomocysteinemia and the response to vitamin supplementation. *Clin Investig* 1993;71:993-8.
  87. Ubbink JB, Vermaak WHJ, van der Merwe A, Becker PJ, Delport R, Potgieter HC. Vitamin requirements for the treatment of hyperhomocysteinemia in humans. *J Nutr* 1994;124:1927-33.
  88. Dierkes J, Kroesen M, Pietrzik K. Folic acid and vitamin B6 supplementation and plasma homocysteine concentrations in healthy young women. *Int J Vitam Nutr Res* 1998;68:98-103.
  89. Homocysteine Lowering Trialists' Collaboration. Lowering blood homocysteine with folic acid based supplements: meta-analysis of randomised trials. *BMJ* 1998;316:894-8.
  90. Guttormsen AB, Ueland PM, Nesthus I, Nygård O, Schneede J, Vollset SE, et al. Determinants and vitamin responsiveness of intermediate hyperhomocysteinemia ( $\Delta$  40 mmol/liter). The Hordaland Homocysteine Study. *J Clin Invest* 1996;98:2174-83.
  91. Ward M, McNulty H, McPartlin J, Strain JJ, Weir DG, Scott JM. Plasma homocysteine, a risk factor for cardiovascular disease, is lowered by physiological doses of folic acid. *Q J Med* 1997;90:519-24.
  92. Jacob RA, Wu MM, Henning SM, Swendsid ME. Homocysteine increases as folate decreases in plasma of healthy men during short-term dietary folate and methyl group restriction. *J Nutr* 1994;124:1072-80.
  93. Franken DG, Boers GHJ, Blom HJ, Trijbels FJM. Effect of various regimens of vitamin B6 and folic acid on mild hyperhomocysteinemia in vascular patients. *J Inherit Metab Dis* 1994;17:159-62.
  94. Franken DG, Boers GHJ, Blom HJ, Trijbels FJM, Kloppenborg PWC. Treatment of mild hyperhomocysteinemia in vascular disease patients. *Arterioscler Thromb* 1994;14:465-70.
  95. Van den Berg M, Franken DG, Boers GHJ, Blom HJ, Jakobs C, Stehouwer CDA, et al. Combined vitamin B6 plus folic acid therapy in young patients with arteriosclerosis and hyperhomocysteinemia. *J Vasc Surg* 1994;20:933-40.
  96. Cuskelly GJ, McNulty H, McPartlin JM, Strain JJ, Scott JM. Plasma homocysteine response to folate intervention in young women. *Ir J Med Sci* 1995;164:3.
  97. Schorah CJ, Devitt H, Lucock M, Dowell AC. The responsiveness of plasma homocysteine to small increases in dietary folic acid: a primary care study. *Eur J Clin Nutr* 1998;52:407-11.
  98. Jacques PF, Selhub J, Bostom AG, Wilson PWF, Rosenberg IH. The effect of folic acid fortification on plasma folate and total homocysteine concentrations. *N Engl J Med* 1999;340:1449-54.
  99. Malinow MR, Duell PB, Hess DL, Anderson PH, Kruger WD, Phillipson BE, et al. Reduction of plasma homocyst(e)ine levels by breakfast cereal fortified with folic acid in patients with coronary heart disease. *N Engl J Med* 1998;338:1009-15.
  100. Rimm EB, Willett WC, Hu FB, Sampson L, Colditz GA, Manson JE, et al. Folate and vitamin B6 from diet and supplements in relation to risk of coronary heart disease among women. *JAMA* 1998;279:359-64.
  101. Peterson JC, Spence JD. Vitamins and progression of atherosclerosis in hyperhomocyst(e)inaemia. *Lancet* 1998;351:263.
  102. Wilcken DEL, Wilcken B. The natural history of vascular disease in homocystinuria and the effects of treatment. *J Inherit Metab Dis* 1997;20:295-300.
  103. Tucker KL, Mahnken B, Wilson PWF, Jacques P, Selhub J. Folic acid fortification of the food supply. Potential benefits and risks for the elderly population. *JAMA* 1996;276:1879-85.
  104. Malinow MR, Bostom AG, Krauss RM. Homocyst(e)ine, diet, and cardiovascular diseases. A statement for healthcare professionals from the nutrition committee, American Heart Association. *Circulation* 1999;99:178-82.
  105. Omenn GS, Beresford SAA, Motulsky AG. Preventing coronary heart disease: B vitamins and homocysteine. *Circulation* 1998;97:421-4.
  106. Genest J Jr. Hyperhomocyst(e)inemia — determining factors and treatment. *Can J Cardiol* 1999;15(Suppl B):35B-38B.
  107. Eikelboom JW, Lonn E, Genest J Jr, Hankey G, Yusuf S. Homocyst(e)ine and cardiovascular disease: a critical review of the epidemiologic evidence. *Ann Intern Med* 1999;131:363-75.

---

**Demandes de tirés à part :** Groupe d'étude canadien sur les soins de santé préventifs, Parkwood Hospital, 801 Commissioners Rd. E, London ON N6C 5J1; [ctf@ctfphc.org](mailto:ctf@ctfphc.org)

**Membres du Groupe d'étude canadien sur les soins de santé préventifs**

**Président :** Dr John W. Feightner, professeur, Département de médecine familiale, Université Western Ontario, London (Ont.).

**Ancien président :** Dr Richard Goldbloom, professeur, Département de pédiatrie, Université Dalhousie, Halifax (N.-É.).

**Membres :** Drs R. Wayne Elford, professeur et directeur de la recherche, Département de médecine familiale, Université de Calgary (Alb.); Michel Labrecque, professeur agrégé et directeur de la recherche, Département de médecine familiale et Centre hospitalier universitaire de Québec, Université Laval, Sainte-Foy

(Qué.); Robin S. McLeod, professeur, département de chirurgie, hôpital Mount Sinai et Université de Toronto, Toronto (Ont.); Harriet MacMillan, professeure agrégée, Départements de psychiatrie et de pédiatrie et Centre for Studies of Children at Risk, Université McMaster, Hamilton (Ont.); Jean-Marie Moutquin, professeur, Département d'obstétrique et de gynécologie et Centre de recherches Saint-François d'Assise, Université Laval, Sainte-Foy (Qué.); Christopher Patterson, professeur et directeur, Division de gériatrie, Département de médecine, Université McMaster, Hamilton (Ont.); Elaine E.L. Wang, professeure agrégée, Départements de pédiatrie et de santé publique, Faculté de médecine, Université de Toronto, Toronto. **Personnes-ressources :** Mme Nadine Wathen, coordonnatrice, et M. Tim Pauley, assistant de recherche, Groupe d'étude canadien sur les soins de santé préventifs, Département de médecine familiale, Université Western Ontario, London (Ont.)

---

**Annexe 1 : Qualité des résultants et classification des recommandations du Groupe d'étude canadien sur les soins de santé préventifs**

---

**Qualité des résultants**

- I Résultants obtenues dans le cadre d'au moins un essai comparatif convenablement randomisé.
- II-1 Résultants obtenues dans le cadre d'essais comparatifs non randomisé bien conçus.
- II-2 Résultants obtenues dans le cadre d'études de cohortes ou d'études analytiques cas-témoins bien conçus, réalisées de préférence dans plus d'un centre ou par plus d'un groupe de recherché.
- II-3 Résultants découlants de comparaisons entre différents lieux ou selon qu'on a ou non recours à une intervention. Des resultants de première importance obtenus dans le cadre d'études non comparatives (par exemple, les résultats du traitement à la pénicilline dans les années 1940) pourraient en outre figurer dans cette catégorie.
- III Opinions exprimées par des sommités dans le domaine, fondées sur l'expérience clinique, études descriptives ou rapports de comités d'experts.

**Classification de recommandations**

- A On dispose de données suffisantes pour appuyer la recommandation selon laquelle il faudrait s'intéresser expressément à cette affection dans le cadre d'un examen médical périodique.
  - B On dispose de données acceptables pour appuyer la recommandation selon laquelle il faudrait s'intéresser expressément à cette affection dans le cadre d'un examen médical périodique.
  - C On dispose de données insuffisantes pour appuyer l'inclusion ou l'exclusion de cette affection dans le cadre d'un examen médical périodique, mais les recommandations peuvent reposer sur d'autres fondements.
  - D On dispose de données acceptables pour appuyer la recommandation de ne pas s'intéresser à cette affection dans le cadre d'un examen médical périodique.
  - E On dispose de données suffisantes pour appuyer la recommandation de ne pas s'intéresser à cette affection dans le cadre d'un examen médical périodique.
-
